# Supplementary material for: DHA-enriched phospholipids from large yellow croaker roe regulate lipid metabolic disorders and gut microbiota imbalance in SD rats with a high-fat diet
Source: Royal Society of Chemistry journal article supplement (doi:10.1039/d1fo00747e), 2021-01-01
Supplement: d1fo00747e1.pdf [file d1fo00747e1.pdf]

Table S1: List of animal experimental feed formula

|                      | <b>Carbohydrate</b> | <b>Protein</b> | <b>Fat</b> | <b>Lard</b> | <b>Whole egg yolk powder</b> | <b>Cholesterol</b> | <b>Bile salt</b> |
|----------------------|---------------------|----------------|------------|-------------|------------------------------|--------------------|------------------|
| <b>Common feed</b>   | 41.47%              | 21.06%         | 14.42%     | 0           | 0                            | 0                  | 0                |
| <b>High fat feed</b> | 32.68%              | 16.69%         | 11.03%     | 10%         | 10%                          | 1%                 | 0.2%             |
